# Supplementary material
Source: PubMed Central journal article supplement (PMC9255938)
Supplement: gbab132_suppl_supplementary_tables.pdf [file gbab132_suppl_supplementary_tables.pdf]

Supplementary Table 1. Descriptive Characteristics of SHARE-COVID Survey Sample

|                                    | Mean/% | (SD)   | Range |
|------------------------------------|--------|--------|-------|
| Feel depressed in last month       | 28.5%  |        | 0-1   |
| Feel more depressed since pandemic | 18.0%  |        | 0-1   |
| Age                                |        |        |       |
| 50-59                              | 26.1%  |        | 0-1   |
| 60-69                              | 38.5%  |        | 0-1   |
| 70-79                              | 22.2%  |        | 0-1   |
| 80+                                | 15.9%  |        | 0-1   |
| Female (Male)                      | 54.0%  |        | 0-1   |
| Partnered (Unpartnered)            | 64.4%  |        | 0-1   |
| Household size                     | 2.13   | (1.05) | 1-18  |
| Employed (Not employed)            | 32.9%  |        | 0-1   |
| Poor self-rated health             | 27.8%  |        | 0-1   |
| # Chronic conditions               | 0.17   | (0.59) | 0-7   |

Notes.  $N = 51,383$  from 27 countries.

Supplementary Table 2. Odds Ratios from Multilevel Logit Regression Models for COVID-19 Bereavement and Depression, by Gender Among Older Adults

|                                      | Model 1                                    |     | Model 2                                         |     |
|--------------------------------------|--------------------------------------------|-----|-------------------------------------------------|-----|
|                                      | Felt sad or depressed<br>in the last month |     | Felt more sad or depressed<br>than Pre-COVID-19 |     |
| Any network bereavement <sup>a</sup> | 1.34                                       | **  | 1.57                                            | *** |
| × Female                             | 1.08                                       |     | 0.98                                            |     |
| National COVID-19 mortality          |                                            |     |                                                 |     |
| 1st quartile (ref)                   |                                            | --  |                                                 | --  |
| 2nd quartile                         | 1.09                                       |     | 0.87                                            |     |
| 3rd quartile                         | 1.16                                       |     | 1.18                                            |     |
| 4th quartile                         | 1.23                                       |     | 1.48                                            | *   |
| Control variables                    |                                            |     |                                                 |     |
| Age                                  |                                            |     |                                                 |     |
| 50-59 (ref)                          |                                            | --  |                                                 | --  |
| 60-69                                | 0.90                                       | **  | 0.93                                            |     |
| 70-79                                | 0.88                                       | **  | 0.87                                            | **  |
| 80+                                  | 1.00                                       |     | 0.97                                            |     |
| Female (Male)                        | 1.97                                       | *** | 2.02                                            | *** |
| Partnered (Unpartnered)              | 0.72                                       | *** | 0.89                                            | *** |
| Household size                       | 0.94                                       | *   | 0.91                                            | **  |
| Employed (Not employed)              | 0.84                                       | *** | 0.95                                            |     |
| Poor self-rated health <sup>b</sup>  | 2.43                                       | *** | 2.00                                            | *** |
| # Chronic conditions <sup>c</sup>    | 1.34                                       | *** | 1.31                                            | *** |
| Baseline mortality                   | 0.99                                       |     | 0.98                                            |     |
| Intercept                            | 0.21                                       | *** | 0.12                                            | *   |
| Random effects                       |                                            |     |                                                 |     |
| Intercept variance                   | 0.09                                       | *** | 0.10                                            | *** |

Notes.  $N = 51,383$ ; Country  $N = 27$ .

<sup>a</sup> Reference group is respondents not reporting COVID-19 deaths. <sup>b</sup> Reference group is self-reported good, very good, or excellent health. <sup>c</sup> Sum of 7 chronic conditions.

\* $p < .05$ . \*\* $p < .01$ . \*\*\* $p < .001$ .

Supplementary Table 3. Odds Ratios from Multilevel Logit Regression Models for National COVID-19 Mortality and Depression, by Gender Among Older Adults

|                                      | Model 1                                    |     | Model 2                                         |     |
|--------------------------------------|--------------------------------------------|-----|-------------------------------------------------|-----|
|                                      | Felt sad or depressed<br>in the last month |     | Felt more sad or depressed<br>than Pre-COVID-19 |     |
| Any network bereavement <sup>a</sup> | 1.41                                       | *** | 1.55                                            | *** |
| National COVID-19 mortality          |                                            |     |                                                 |     |
| 1st quartile (ref)                   |                                            | --  |                                                 | --  |
| 2nd quartile                         | 1.01                                       |     | 0.81                                            |     |
| 3rd quartile                         | 1.05                                       |     | 1.07                                            |     |
| 4th quartile                         | 1.03                                       |     | 1.23                                            |     |
| Interactions                         |                                            |     |                                                 |     |
| 1st quartile × Female (ref)          |                                            | --  |                                                 | --  |
| 2nd quartile × Female                | 1.12                                       |     | 1.12                                            |     |
| 3rd quartile × Female                | 1.16                                       | *   | 1.15                                            |     |
| 4th quartile × Female                | 1.32                                       | *** | 1.30                                            | *** |
| Control variables                    |                                            |     |                                                 |     |
| Age                                  |                                            |     |                                                 |     |
| 50-59 (ref)                          |                                            | --  |                                                 | --  |
| 60-69                                | 0.90                                       | **  | 0.93                                            |     |
| 70-79                                | 0.88                                       | **  | 0.87                                            | **  |
| 80+                                  | 0.99                                       |     | 0.91                                            | **  |
| Female (Male)                        | 1.71                                       | *** | 1.74                                            | *** |
| Partnered (Unpartnered)              | 0.72                                       | *** | 0.89                                            | *** |
| Household size                       | 0.94                                       | *   | 0.91                                            | **  |
| Employed (Not employed)              | 0.84                                       | *** | 0.95                                            |     |
| Poor self-rated health <sup>b</sup>  | 2.43                                       | *** | 2.00                                            | *** |
| # Chronic conditions <sup>c</sup>    | 1.34                                       | *** | 1.31                                            | *** |
| Baseline mortality                   | 0.99                                       |     | 0.98                                            |     |
| Intercept                            | 0.23                                       | *** | 0.13                                            | *** |
| Random effects                       |                                            |     |                                                 |     |
| Intercept variance                   | 0.09                                       | *** | 0.10                                            | *** |

Notes.  $N = 51,383$ ; Country  $N = 27$ .

<sup>a</sup> Reference group is respondents not reporting COVID-19 deaths. <sup>b</sup> Reference group is self-reported good, very good, or excellent health. <sup>c</sup> Sum of 7 chronic conditions.

\* $p < .05$ . \*\* $p < .01$ . \*\*\* $p < .001$ .

Supplementary Table 4. Odds Ratios from Multilevel Logit Regression Models for Individual COVID-19 Bereavement, by National COVID-19 Mortality for Depression

|                                      | Model 1  | Model 2  | Model 3  |
|--------------------------------------|----------|----------|----------|
| Any network bereavement <sup>a</sup> | 1.14     | --       | --       |
| Family bereavement                   | --       | 1.86     | --       |
| Nonfamily bereavement                | --       | --       | 0.79     |
| National COVID-19 mortality          |          |          |          |
| 1st quartile (ref)                   | --       | --       | --       |
| 2nd quartile                         | 1.09     | 1.10     | 1.09     |
| 3rd quartile                         | 1.16     | 1.16     | 1.16     |
| 4th quartile                         | 1.23     | 1.25     | 1.24     |
| Interactions                         |          |          |          |
| 1st quartile × bereavement (ref)     | --       | --       | --       |
| 2nd quartile × bereavement           | 1.22     | 0.82     | 1.66     |
| 3rd quartile × bereavement           | 1.24     | 0.84     | 1.73     |
| 4th quartile × bereavement           | 1.23     | 0.82     | 1.69     |
| Control variables                    |          |          |          |
| Age                                  |          |          |          |
| 50-59 (ref)                          | --       | --       | --       |
| 60-69                                | 0.90 **  | 0.90 **  | 0.90 **  |
| 70-79                                | 0.88 **  | 0.89 **  | 0.88 **  |
| 80+                                  | 1.00     | 1.00     | 0.99     |
| Female (Male)                        | 1.98 *** | 1.97 *** | 1.98 *** |
| Partnered (Unpartnered)              | 0.72 *** | 0.72 *** | 0.72 *** |
| Household size                       | 0.94 *   | 0.94 *   | 0.94 *   |
| Employed (Not employed)              | 0.84 *** | 0.84 *** | 0.84 *** |
| Poor self-rated health <sup>b</sup>  | 2.43 *** | 2.43 *** | 2.43 *** |
| # Chronic conditions <sup>c</sup>    | 1.34 *** | 1.34 *** | 1.34 *** |
| Baseline mortality                   | 0.99     | 0.99     | 0.99     |
| Intercept                            | 0.21 *** | 1.21 *** | 1.21 *** |
| Random effects                       |          |          |          |
| Intercept variance                   | 0.09 *** | 0.09 *** | 0.09 *** |

Notes.  $N = 51,383$ ; Country  $N = 27$ .

<sup>a</sup> Reference group is respondents not reporting COVID-19 deaths of each type. <sup>b</sup> Reference group is self-reported good, very good, or excellent health. <sup>c</sup> Sum of 7 chronic conditions.

\* $p < .05$ . \*\* $p < .01$ . \*\*\* $p < .001$ .

Supplementary Table 5. Odds Ratios from Multilevel Logit Regression Models for Individual COVID-19 Bereavement, by National COVID-19 Mortality for Worsening Depression

|                                      | Model 1  | Model 2  | Model 3  |
|--------------------------------------|----------|----------|----------|
| Any network bereavement <sup>a</sup> | 1.82     | --       | --       |
| Family bereavement                   | --       | 3.57     | --       |
| Nonfamily bereavement                | --       | --       | 1.14     |
| National COVID-19 mortality          |          |          |          |
| 1st quartile (ref)                   | --       | --       | --       |
| 2nd quartile                         | 0.88     | 0.88     | 0.88     |
| 3rd quartile                         | 1.18     | 1.19     | 1.18     |
| 4th quartile                         | 1.48 *   | 1.51 *   | 1.50 *   |
| Interactions                         |          |          |          |
| 1st quartile × bereavement (ref)     | --       | --       | --       |
| 2nd quartile × bereavement           | 0.68     | 0.39     | 1.02     |
| 3rd quartile × bereavement           | 0.96     | 0.60     | 1.40     |
| 4th quartile × bereavement           | 0.83     | 0.45     | 1.27     |
| Control variables                    |          |          |          |
| Age                                  |          |          |          |
| 50-59 (ref)                          | --       | --       | --       |
| 60-69                                | 0.93     | 0.93     | 0.93     |
| 70-79                                | 0.87 **  | 0.88 **  | 0.87 **  |
| 80+                                  | 0.91     | 0.92     | 0.91     |
| Female (Male)                        | 2.02 *** | 2.01 *** | 2.02 *** |
| Partnered (Unpartnered)              | 0.89 *** | 0.89 *** | 0.90 *** |
| Household size                       | 0.91 **  | 0.91 **  | 0.91 **  |
| Employed (Not employed)              | 0.95     | 0.95     | 0.95     |
| Poor self-rated health <sup>b</sup>  | 2.00 *** | 2.00 *** | 2.00 *** |
| # Chronic conditions <sup>c</sup>    | 1.31 *** | 1.31 *** | 1.31 *** |
| Baseline mortality                   | 0.98     | 0.98     | 0.98     |
| Intercept                            | 0.12 *** | 0.12 *** | 1.12 *** |
| Random effects                       |          |          |          |
| Intercept variance                   | 0.10 *** | 0.10 *** | 0.10 *** |

Notes.  $N = 51,383$ ; Country  $N = 27$ .

<sup>a</sup> Reference group is respondents not reporting COVID-19 deaths of each type. <sup>b</sup> Reference group is self-reported good, very good, or excellent health. <sup>c</sup> Sum of 7 chronic conditions.

\* $p < .05$ . \*\* $p < .01$ . \*\*\* $p < .001$ .
